# Supplementary material for: Perylene and naphthalene diimide polymers for all-polymer solar cells: a comparative study of chemical copolymerization and physical blend
Source: Royal Society of Chemistry journal article supplement (doi:10.1039/c5py00665a), 2015-01-01
Supplement: c5py00665a1.pdf [file c5py00665a1.pdf]

Electronic Supplementary Information for:

**Perylene and naphthalene diimide polymers for all-polymer solar cells:  
A comparative study of chemical copolymerization and physical blend**

Shuixing Dai,<sup>ab</sup> Pei Cheng,<sup>cd</sup> Yuze Lin,<sup>c</sup> Yifan Wang,<sup>cd</sup> Lanchao Ma,<sup>cd</sup> Qidan Ling, <sup>\*a</sup> and  
Xiaowei Zhan<sup>\*b</sup>

<sup>a</sup> *Fujian Key Laboratory of Polymer Materials, College of Materials Science and Engineering,  
Fujian Normal University, Fuzhou 350007, China.*

<sup>b</sup> *Department of Materials Science and Engineering, College of Engineering, Key Laboratory of  
Polymer Chemistry and Physics of Ministry of Education, Peking University, Beijing 100871, China.*

*E-mail: [xwzhan@pku.edu.cn](mailto:xwzhan@pku.edu.cn)*

<sup>c</sup> *Beijing National Laboratory for Molecular Sciences and Key Laboratory of Organic Solids,  
Institute of Chemistry, Chinese Academy of Sciences, Beijing 100190, China.*

<sup>d</sup> *University of Chinese Academy of Sciences, Beijing 100049, China.*

**Table S1** Photovoltaic performance of P3HT: PPDI100 blend with different weight ratio

| D/A (w/w) <sup>a</sup> | $V_{OC}$ (V) | $J_{SC}$ (mA cm <sup>-2</sup> ) | FF (%) | PCE (%) <sup>b</sup> |
|------------------------|--------------|---------------------------------|--------|----------------------|
| 3.5:1                  | 0.618        | 2.81                            | 62.8   | 1.09 (1.07)          |
| 3:1                    | 0.621        | 3.40                            | 65.4   | 1.38 (1.31)          |
| 2.5:1                  | 0.611        | 2.99                            | 61.3   | 1.12 (1.11)          |
| 1.5:1                  | 0.606        | 1.90                            | 60.8   | 0.70 (0.68)          |
| 1:1                    | 0.620        | 0.78                            | 55.5   | 0.27 (0.26)          |
| 1:1.5                  | 0.592        | 0.18                            | 33.9   | 0.04 (0.03)          |

<sup>a</sup>Annealing at 150 °C for 10 min in N<sub>2</sub> atmosphere. <sup>b</sup>Average PCE in brackets.

**Table S2** Photovoltaic performance of P3HT: PPDI75-co-NDI25 blend with different weight ratio

| D/A (w/w) <sup>a</sup> | $V_{OC}$ (V) | $J_{SC}$ (mA cm <sup>-2</sup> ) | FF (%) | PCE (%) <sup>b</sup> |
|------------------------|--------------|---------------------------------|--------|----------------------|
| 3:1                    | 0.639        | 2.84                            | 55.3   | 1.00 (0.95)          |
| 2.5:1                  | 0.632        | 2.90                            | 60.3   | 1.11 (1.05)          |
| 2:1                    | 0.638        | 2.55                            | 56.4   | 0.92 (0.87)          |
| 1:1                    | 0.629        | 2.45                            | 57.6   | 0.89 (0.84)          |
| 1:2                    | 0.620        | 2.37                            | 36.6   | 0.54 (0.52)          |

<sup>a</sup>Annealing at 150 °C for 10 min in N<sub>2</sub> atmosphere. <sup>b</sup>Average PCE in brackets.

**Table S3** Photovoltaic performance of P3HT: PPDI50-co-NDI50 blend with different weight ratio

| D/A (w/w) <sup>a</sup> | $V_{OC}$ (V) | $J_{SC}$ (mA cm <sup>-2</sup> ) | FF (%) | PCE (%) <sup>b</sup> |
|------------------------|--------------|---------------------------------|--------|----------------------|
| 3:1                    | 0.649        | 3.22                            | 61.3   | 1.28 (1.21)          |
| 2.5:1                  | 0.652        | 3.29                            | 61.4   | 1.32 (1.29)          |
| 2:1                    | 0.650        | 2.35                            | 55.3   | 0.84 (0.75)          |
| 1:1                    | 0.610        | 1.59                            | 56.1   | 0.54 (0.49)          |
| 1:2                    | 0.595        | 1.04                            | 58.7   | 0.36 (0.33)          |

<sup>a</sup>Annealing at 150 °C for 10 min in N<sub>2</sub> atmosphere. <sup>b</sup>Average PCE in brackets.

**Table S4** Photovoltaic performance of P3HT: PPDI25-*co*-NDI75 blend with different weight ratio

| D/A (w/w) <sup>a</sup> | $V_{OC}$ (V) | $J_{SC}$ (mA cm <sup>-2</sup> ) | FF (%) | PCE (%) <sup>b</sup> |
|------------------------|--------------|---------------------------------|--------|----------------------|
| 3.5:1                  | 0.682        | 2.96                            | 54.2   | 1.09 (1.07)          |
| 3:1                    | 0.682        | 3.62                            | 62.4   | 1.54 (1.45)          |
| 2.5:1                  | 0.681        | 3.24                            | 65.1   | 1.44 (1.36)          |
| 1.5:1                  | 0.680        | 2.97                            | 63.5   | 1.28 (1.22)          |
| 1:1                    | 0.677        | 2.82                            | 57.8   | 1.10 (1.04)          |
| 1:1.5                  | 0.663        | 2.63                            | 48.3   | 0.84 (0.77)          |

<sup>a</sup>Annealing at 150 °C for 10 min in N<sub>2</sub> atmosphere. <sup>b</sup>Average PCE in brackets.

**Table S5** Photovoltaic performance of P3HT: PNDI100 blend with different weight ratio

| D/A (w/w) <sup>a</sup> | $V_{OC}$ (V) | $J_{SC}$ (mA cm <sup>-2</sup> ) | FF (%) | PCE (%) <sup>b</sup> |
|------------------------|--------------|---------------------------------|--------|----------------------|
| 2.5:1                  | 0.707        | 2.18                            | 51.6   | 0.80 (0.71)          |
| 2:1                    | 0.706        | 2.87                            | 55.3   | 1.12 (1.06)          |
| 1.5:1                  | 0.716        | 1.95                            | 59.7   | 0.84 (0.80)          |
| 1:1                    | 0.720        | 1.00                            | 40.6   | 0.29 (0.28)          |
| 1:1.5                  | 0.678        | 0.69                            | 34.5   | 0.16 (0.15)          |

<sup>a</sup>Annealing at 150 °C for 10 min in N<sub>2</sub> atmosphere. <sup>b</sup>Average PCE in brackets.

**Table S6** Photovoltaic performance of P3HT: PPDI-*co*-NDI binary blend and P3HT: PPDI100: PNDI100 ternary blend with different weight ratio

| blend                          | D/A (w/w) <sup>a</sup> | $V_{OC}$ (V) | $J_{SC}$ (mA cm <sup>-2</sup> ) | FF (%) | PCE (%) <sup>b</sup> |
|--------------------------------|------------------------|--------------|---------------------------------|--------|----------------------|
| P3HT: PPDI75- <i>co</i> -NDI25 | 2.5:1                  | 0.632        | 2.90                            | 60.3   | 1.11 (1.05)          |

|                                |               |       |      |      |             |
|--------------------------------|---------------|-------|------|------|-------------|
| P3HT: PPDI100:<br>PNDI100      | 2.5:0.75:0.25 | 0.608 | 2.48 | 49.0 | 0.74 (0.72) |
| P3HT: PPDI50- <i>co</i> -NDI50 | 2.5:1         | 0.652 | 3.29 | 61.4 | 1.32 (1.29) |
| P3HT: PPDI100:<br>PNDI100      | 2.5:0.5:0.5   | 0.632 | 2.25 | 55.4 | 0.79 (0.74) |
| P3HT: PPDI75- <i>co</i> -NDI25 | 3:1           | 0.682 | 3.62 | 62.4 | 1.54 (1.45) |
| P3HT: PPDI100:<br>PNDI100      | 3:0.25:0.75   | 0.656 | 2.47 | 50.9 | 0.83 (0.80) |

<sup>a</sup>Annealing at 150 °C for 10 min in N<sub>2</sub> atmosphere. <sup>b</sup>Average PCE in brackets.

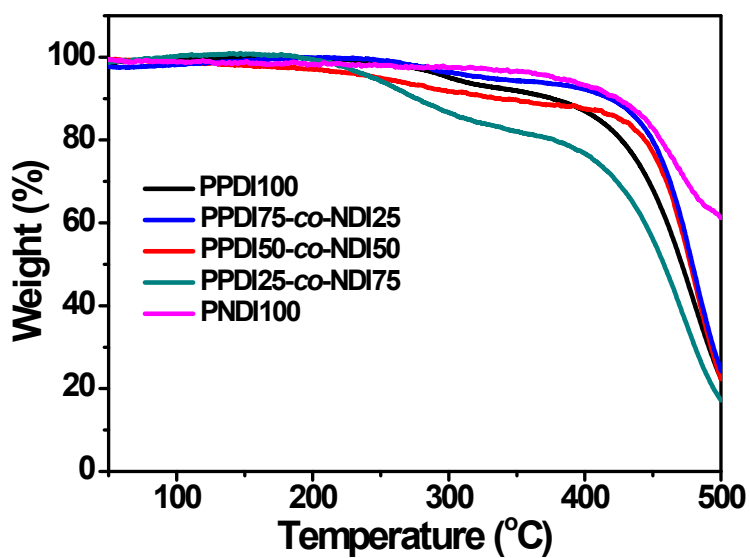

**Fig. S1** TGA curves of PPDI-*co*-NDI copolymers.

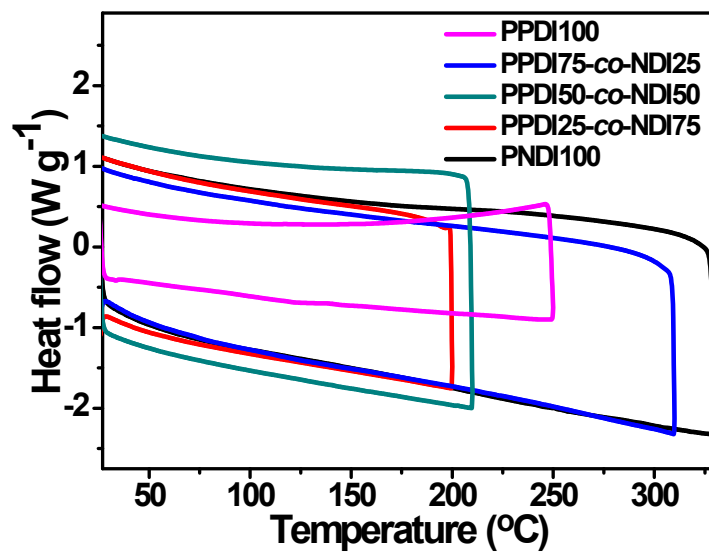

Fig. S2 DSC curves of PPDI-*co*-NDI copolymers.

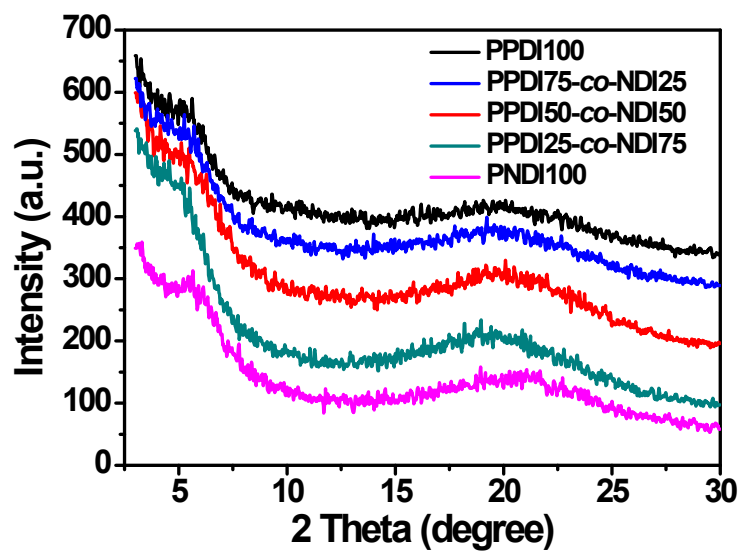

Fig. S3 XRD patterns of films of PPDI-*co*-NDI copolymers.

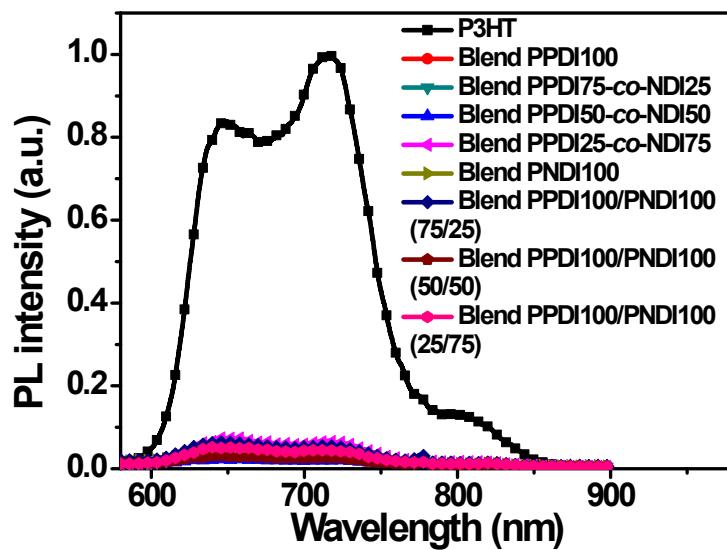

**Fig. S4** Photoluminescence spectra of P3HT neat film, P3HT: PPDI-*co*-NDI binary blended films and P3HT: PPDI100: PNDI100 ternary blended films (excitation at 520 nm).

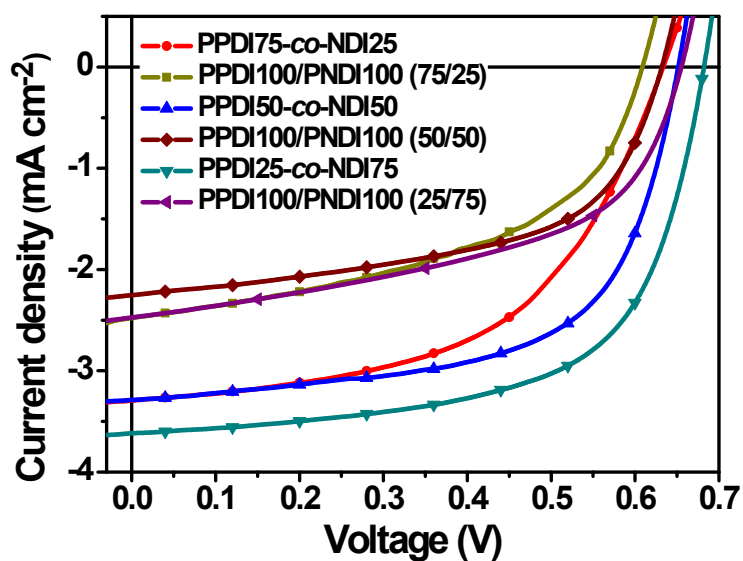

**Fig. S5**  $J$ - $V$  characteristics of device based on P3HT: PPDI-*co*-NDI binary blend and P3HT: PPDI100: PNDI100 ternary blend.

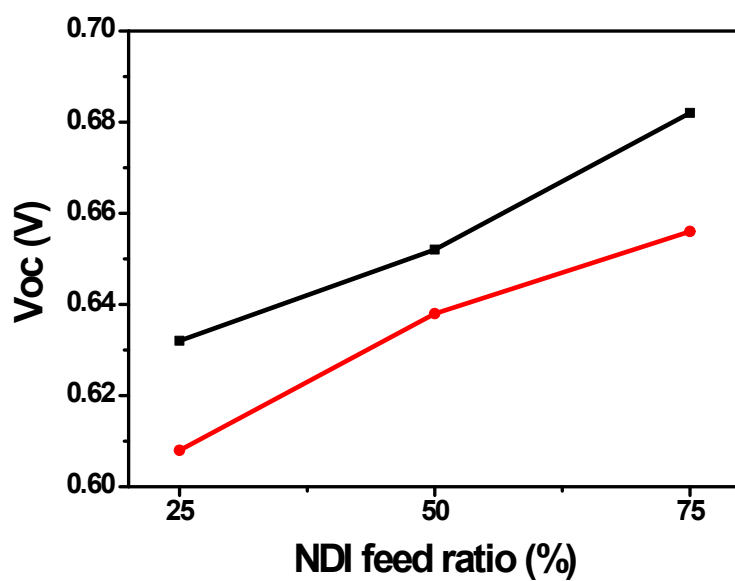

**Fig. S6**  $V_{oc}$  of P3HT: PPDI-*co*-NDI binary blend (black line) and P3HT: PPDI100: PNDI100 ternary blend (red line) vs. NDI feed ratio.

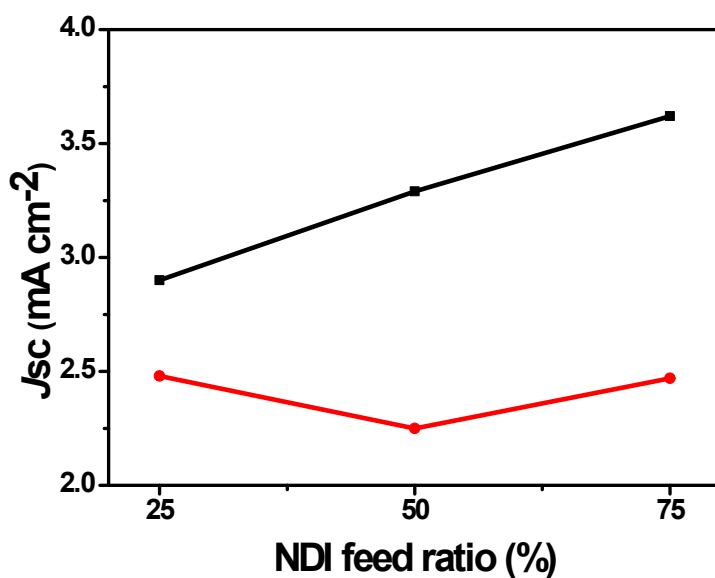

**Fig. S7**  $J_{sc}$  of P3HT: PPDI-*co*-NDI binary blend (black line) and P3HT: PPDI100: PNDI100 ternary blend (red line) vs. NDI feed ratio.

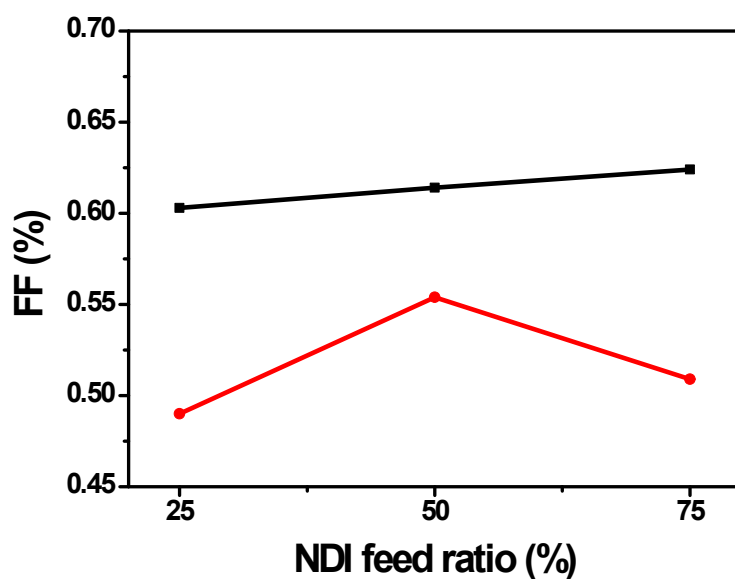

**Fig. S8** FF of P3HT: PPDI-*co*-NDI binary blend (black line) and P3HT: PPDI100: PNDI100 ternary blend (red line) vs. NDI feed ratio.

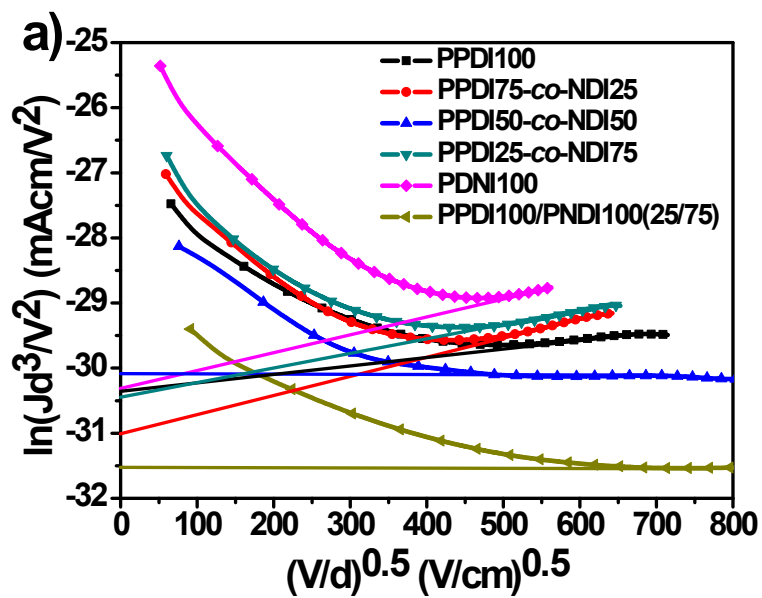



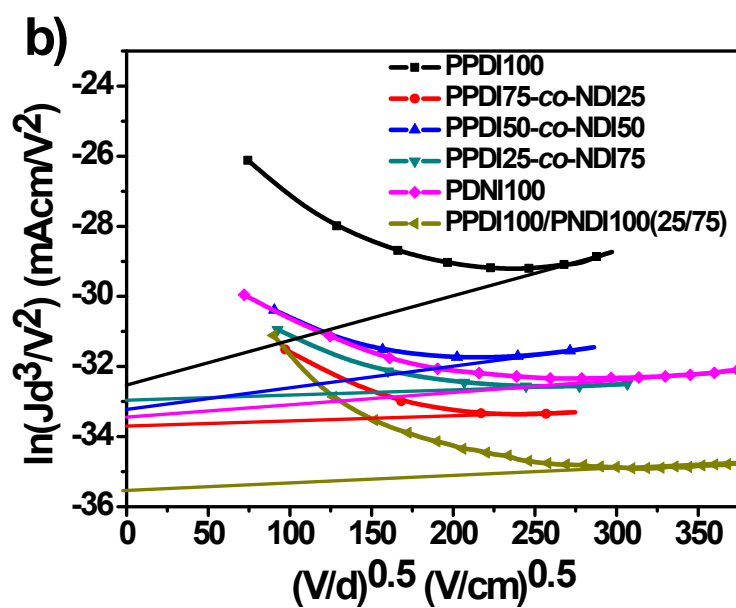

**Fig. S9** J-V characteristics measured under dark for (a) hole-only and (b) electron-only device based on P3HT: polymer acceptor blended film.

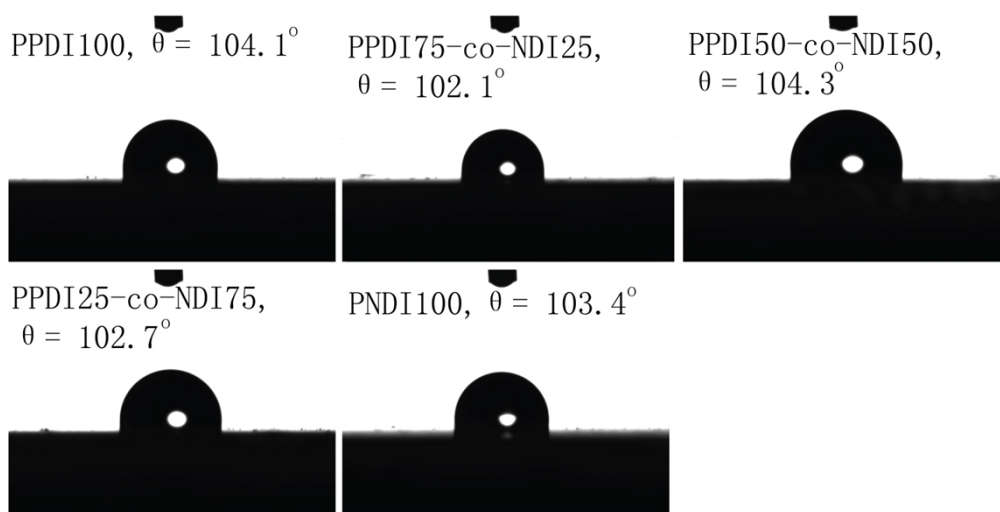

**Fig. S10** The contact angles ( $\theta$ ) of PPDI-co-NDI neat films spin-coated on a quartz substrate.
